# Supplementary material
Source: ML conference proceedings conference paper supplement (https://proceedings.mlr.press/v70/andreas17a.html)
Supplement: Supplementary file [file andreas17a-supp.pdf]

## A. Tasks and Sketches

The complete list of tasks, sketches, and symbols is given below. Tasks marked with an asterisk\* are held out for the generalization experiments described in Section 4.5, but included in the multitask training experiments in Sections 4.3 and 4.4.

| Goal                        | Sketch    |               |             |               |         |
|-----------------------------|-----------|---------------|-------------|---------------|---------|
| <b>Crafting environment</b> |           |               |             |               |         |
| make plank                  | get wood  | use toolshed  |             |               |         |
| make stick                  | get wood  | use workbench |             |               |         |
| make cloth                  | get grass | use factory   |             |               |         |
| make rope                   | get grass | use toolshed  |             |               |         |
| make bridge                 | get iron  | get wood      | use factory |               |         |
| make bed*                   | get wood  | use toolshed  | get grass   | use workbench |         |
| make axe*                   | get wood  | use workbench | get iron    | use toolshed  |         |
| make shears                 | get wood  | use workbench | get iron    | use workbench |         |
| get gold                    | get iron  | get wood      | use factory | use bridge    |         |
| get gem                     | get wood  | use workbench | get iron    | use toolshed  | use axe |
| <b>Maze environment</b>     |           |               |             |               |         |
| room 1                      | left      | left          |             |               |         |
| room 2                      | left      | down          |             |               |         |
| room 3                      | right     | down          |             |               |         |
| room 4                      | up        | left          |             |               |         |
| room 5                      | up        | right         |             |               |         |
| room 6                      | up        | right         | up          |               |         |
| room 7                      | down      | right         | up          |               |         |
| room 8                      | left      | left          | down        |               |         |
| room 9                      | right     | down          | down        |               |         |
| room 10                     | left      | up            | right       |               |         |
| <b>Cliff environment</b>    |           |               |             |               |         |
| path 0                      | north     |               |             |               |         |
| path 1                      | east      |               |             |               |         |
| path 2                      | south     |               |             |               |         |
| path 3                      | west      |               |             |               |         |
| path 4                      | west      | south         |             |               |         |
| path 5                      | west      | north         | north       |               |         |
| path 6                      | north     | east          | north       |               |         |
| path 7                      | west      | north         |             |               |         |
| path 8                      | east      | south         |             |               |         |
| path 9                      | north     | west          | west        |               |         |
| path 10                     | east      | north         | east        |               |         |
| path 11                     | south     | east          |             |               |         |
| path 12                     | south     | west          |             |               |         |
| path 13                     | south     | south         |             |               |         |
| path 14                     | south     | south         | west        |               |         |
| path 15                     | east      | south         | south       |               |         |
| path 16                     | east      | east          |             |               |         |
| path 17                     | east      | north         |             |               |         |
| path 18                     | north     | east          |             |               |         |
| path 19                     | west      | west          |             |               |         |
| path 20                     | north     | north         |             |               |         |
| path 21                     | north     | west          |             |               |         |
| path 22                     | west      | west          | south       |               |         |
| path 23                     | south     | east          | south       |               |         |
